# Supplementary material
Source: ML conference proceedings conference paper supplement (https://openaccess.thecvf.com/content/CVPR2022/html/Ben-Shabat_DiGS_Divergence_Guided_CVPR_2022_paper.html)
Supplement: Supplementary file 2 [file Ben-Shabat_DiGS_Divergence_Guided_CVPR_2022_supplemental.zip]

Archive with 2 entries (2 files):
- 07362-supp/supp.pdf
- 07362-supp/video-url.txt
