# Supplementary material
Source: ML conference proceedings conference paper supplement (https://openaccess.thecvf.com/content/CVPR2022/html/Ben-Shabat_DiGS_Divergence_Guided_CVPR_2022_paper.html)
Supplement: Supplementary file 2 [file Ben-Shabat_DiGS_Divergence_Guided_CVPR_2022_supplemental.zip › 07362-supp/video-url.txt]

A high resolution video showcasing our results is available at
https://drive.google.com/file/d/1CuP8KN93JpzWY-597g0945r5VCIEOi3D/view?usp=sharing
